# Supplementary material for: Comparison study of surface-initiated hydrogel coatings with distinct side-chains for improving biocompatibility of polymeric heart valves
Source: Royal Society of Chemistry journal article supplement (doi:10.1039/d4bm00158c), 2024-01-01
Supplement: d4bm00158c1.pdf [file d4bm00158c1.pdf]

Marker

PMPC-1  
pAMPS-1  
PHEMA-1  
CTRL-1  
Mock-1  
PMPC-2  
pAMPS-2  
PHEMA-2  
CTRL-2  
Mock-2  
PMPC-3  
pAMPS-3  
PHEMA-3  
CTRL-3  
Mock-3

IL-1 $\beta$   
31;17kDa

Marker

pMPC-1  
pAMPS-1  
pHEMA-1  
CTRL-1  
Mock-1  
pMPC-2  
pAMPS-2  
pHEMA-2  
CTRL-2  
Mock-2  
pMPC-3  
pAMPS-3  
pHEMA-3  
CTRL-3  
Mock-3

IL-6  
23kDa

Marker

PMPC-1  
pAMPS-1  
pHEMA-1  
CTRL-1  
Mock-1  
PMPC-2  
pAMPS-2  
pHEMA-2  
CTRL-2  
Mock-2  
PMPC-3  
pAMPS-3  
pHEMA-3  
CTRL-3  
Mock-3

TNF $\alpha$   
26kDa

Marker

PMPC-1  
PAMPS-1  
PHEMA-1  
CTRL-1  
Mock-1  
PMPC-2  
PAMPS-2  
PHEMA-2  
CTRL-2  
Mock-2  
PMPC-3  
PAMPS-3  
PHEMA-3  
CTRL-3  
Mock-3

$\beta$ -actin  
42kDa

PMPC-1 PAMPS-1 PHEMA-1 CTRL-1 Mock-1  
PMPC-2 PAMPS-2 PHEMA-2 CTRL-2 Mock-2  
PMPC-3 PAMPS-3 PHEMA-3 CTRL-3 Mock-3

IL-1 $\beta$   
31;17kDa

IL-6  
23kDa

TNF $\alpha$   
26kDa

$\beta$ -actin  
42kDa
